# Supplementary material for: Patterns of Evolutionary Conservation of Essential Genes Correlate with Their Compensability
Source: PubMed Central journal article supplement (PMC3386227; doi:10.1371/journal.pgen.1002803), 2012-06-28

**PhoA activity**

1700

1600

1500

100

80

60

40

20

0

**TB741 expressing**

*dpiA*

*rho*

*ispU*

*degP*

*yciR*

*yhbJ*

*ftnA*

pCA24N

pCA24N  
0.1% ara

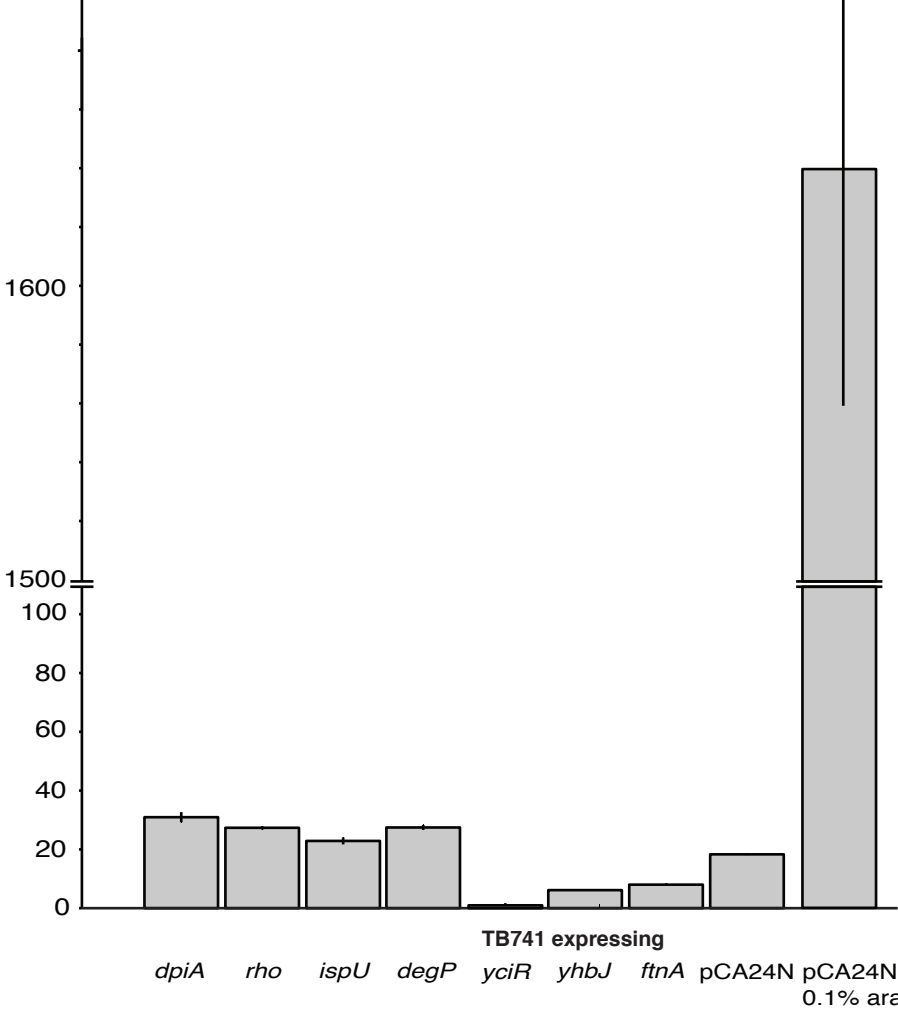

Supplement: pgen.1002803.s001.pdf [file pgen.1002803.s001.pdf]
