# Supplementary material for: Patterns of Evolutionary Conservation of Essential Genes Correlate with Their Compensability
Source: PubMed Central journal article supplement (PMC3386227; doi:10.1371/journal.pgen.1002803), 2012-06-28

**A**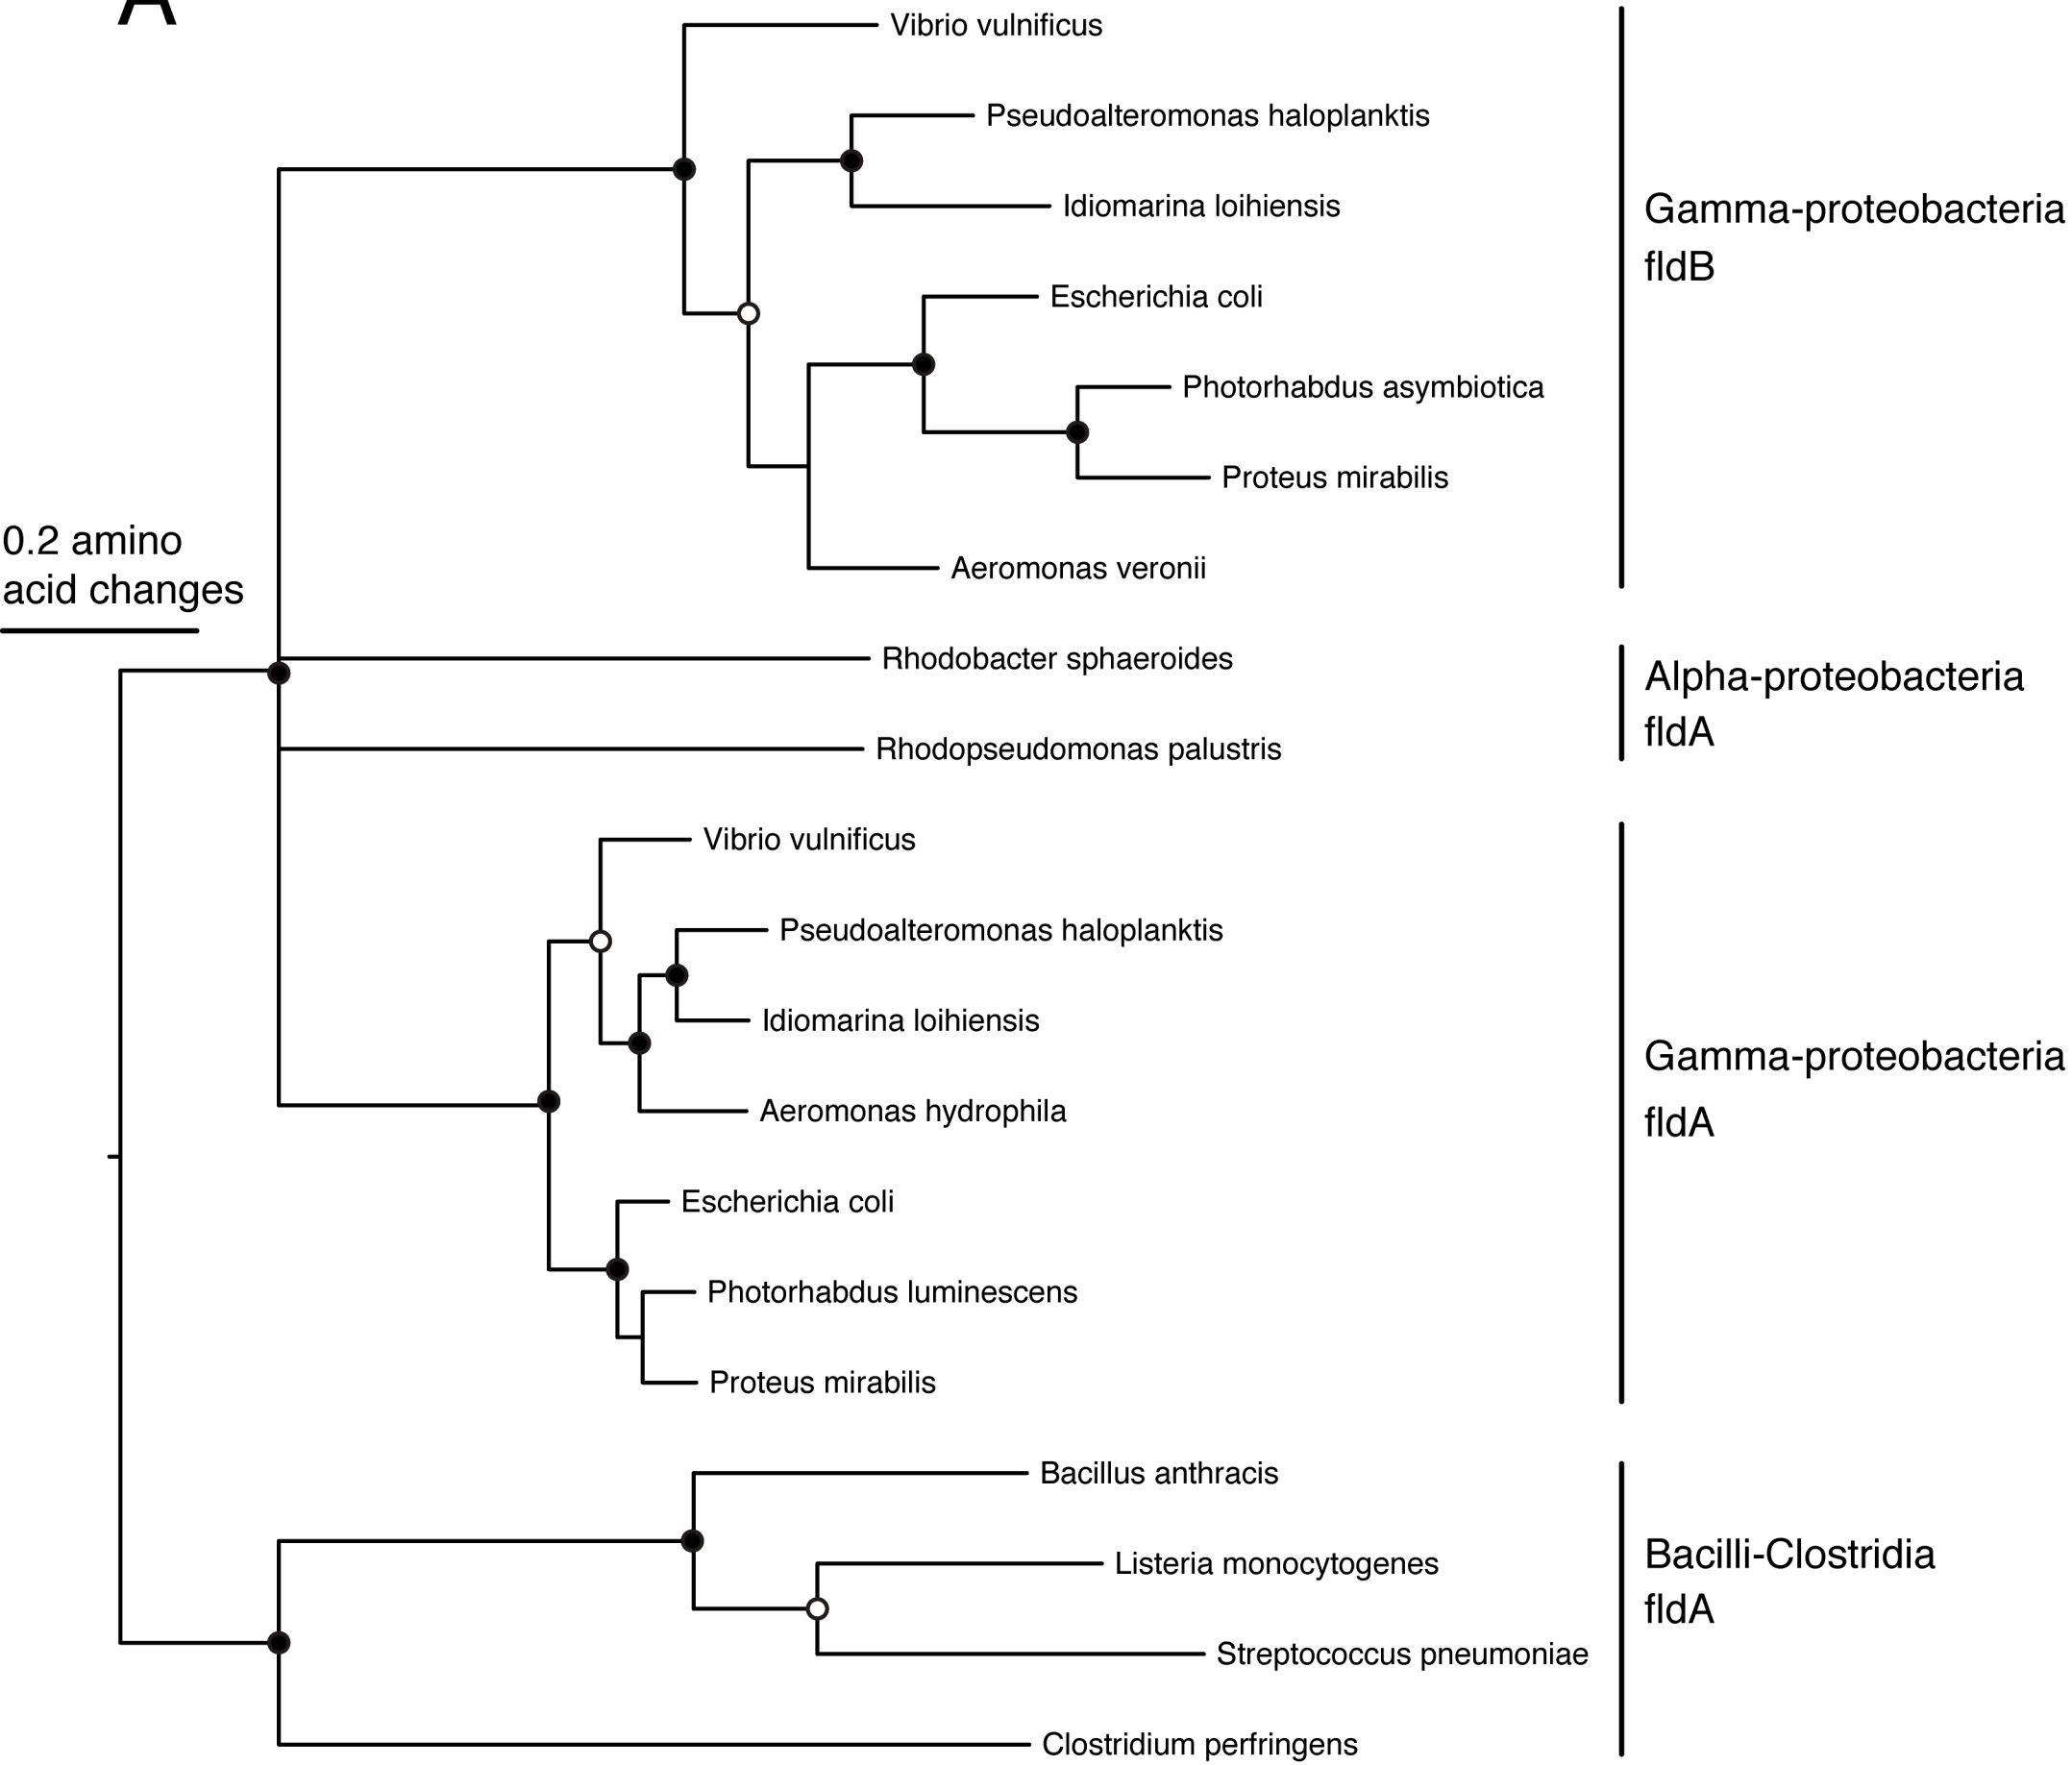**B**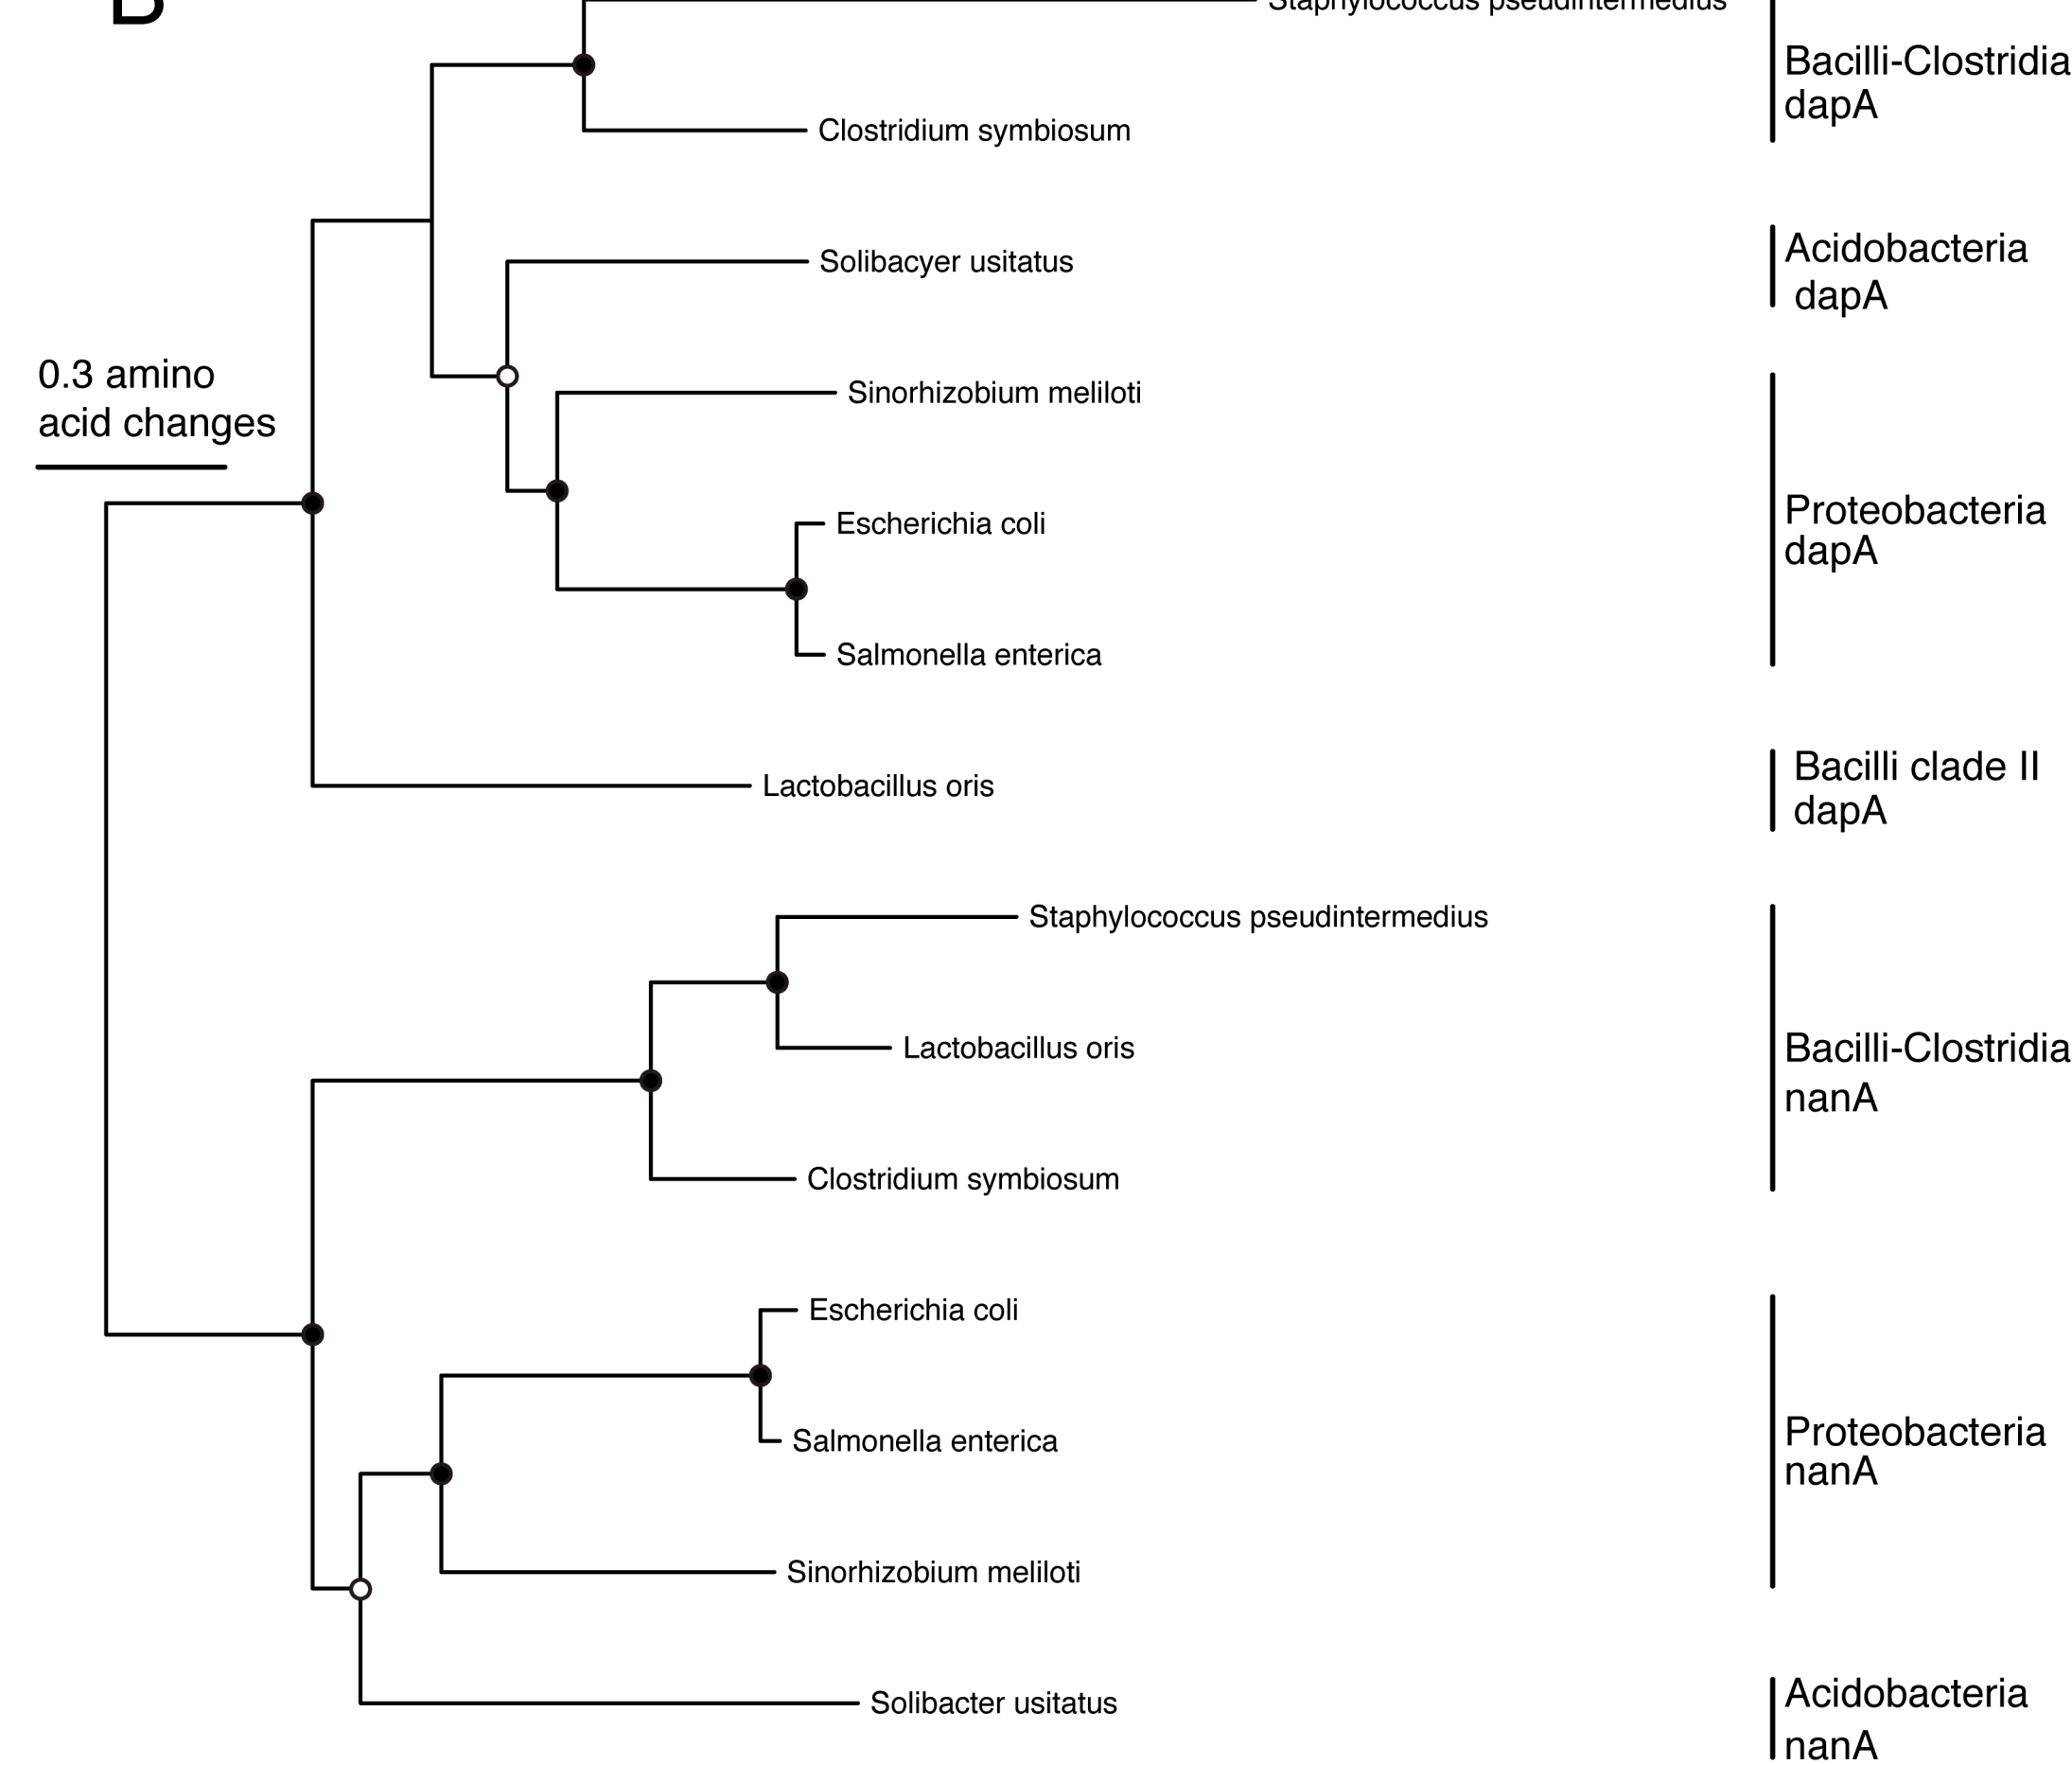

Supplement: pgen.1002803.s002.pdf [file pgen.1002803.s002.pdf]
